# Supplementary material for: Regulating the size and assembled structure of graphene building blocks for high-performance silicon nanocomposite anodes
Source: Royal Society of Chemistry journal article supplement (doi:10.1039/d3ya00203a), 2023-01-01
Supplement: d3ya00203a1.pdf [file d3ya00203a1.pdf]

## Supplementary Information

# Regulating the Size and Assembled Structure of Graphene Building Blocks for High-Performance Silicon Nanocomposite Anodes

Bo Nie,<sup>a</sup> David Sanchez,<sup>b</sup> Mataz Alcoutlabi,<sup>b</sup> Tengxiao Liu,<sup>c</sup> Saurabh Basu,<sup>a</sup> Soundar Kumara,<sup>a</sup>  
Gongkai Wang<sup>d\*</sup> and Hongtao Sun,<sup>a,e\*</sup>

<sup>a</sup>*The Harold & Inge Marcus Department of Industrial & Manufacturing Engineering, The Pennsylvania State University, University Park 16802, Pennsylvania, USA.*

<sup>b</sup>*Department of Mechanical Engineering, The University of Texas, Rio Grande Valley 78539, Texas, USA*

<sup>c</sup>*Department of Biomedical Engineering, The Pennsylvania State University, University Park 16802, Pennsylvania, USA.*

<sup>d</sup>*Tianjin Key Laboratory of Materials Laminating Fabrication and Interface Control Technology, School of Material Science and Engineering, Hebei University of Technology, Tianjin, 300130, China.*

<sup>e</sup>*Materials Research Institute (MRI), The Pennsylvania State University, University Park 16802, Pennsylvania, USA.*

\*Corresponding author.

Email address: [hongtao.sun@psu.edu](mailto:hongtao.sun@psu.edu) (H. Sun); [tq15160@psu.edu](mailto:tq15160@psu.edu) (T. Liu);  
[wang.gongkai@hebut.edu.cn](mailto:wang.gongkai@hebut.edu.cn) (G. Wang);

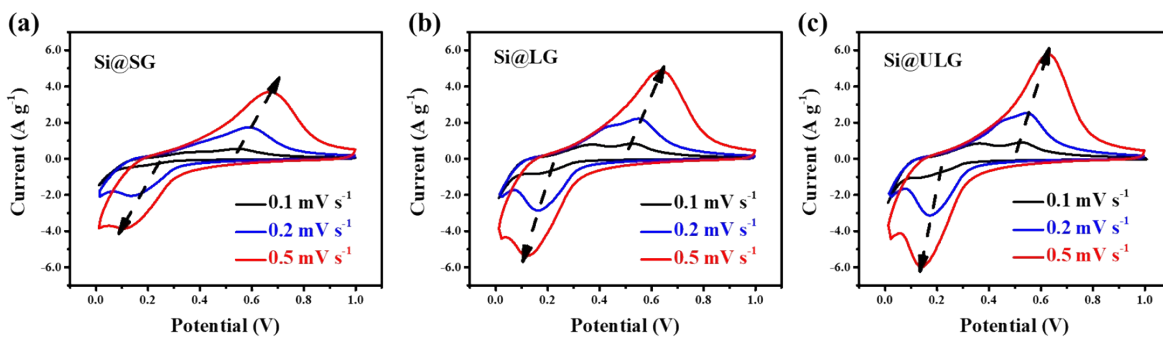

**Fig. S1.** The cyclic voltammetry curves for the Si@ULG, Si@LG, and Si@SG nanocomposite anodes at scan rates of 0.1, 0.2, and 0.5 mV s<sup>-1</sup>.

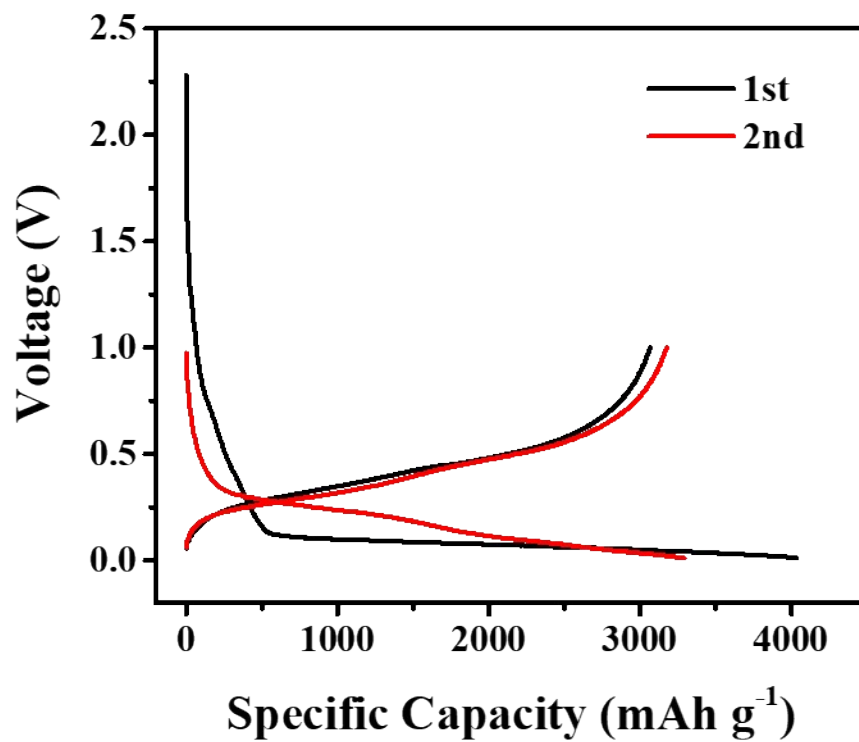

**Fig. S2.** The first two charge-discharge curves for the Si@ULG nanocomposite anode at C/20.

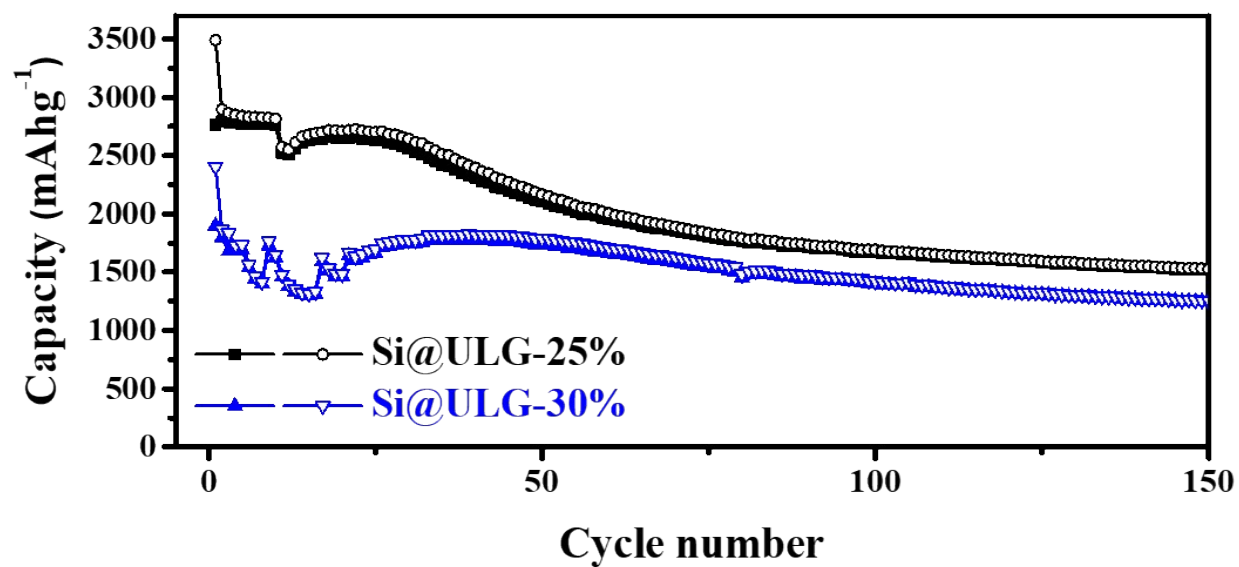

**Fig. S3.** The cyclic performance of Si@ULG nanocomposite electrode with different ULG weight percentages at C/5.

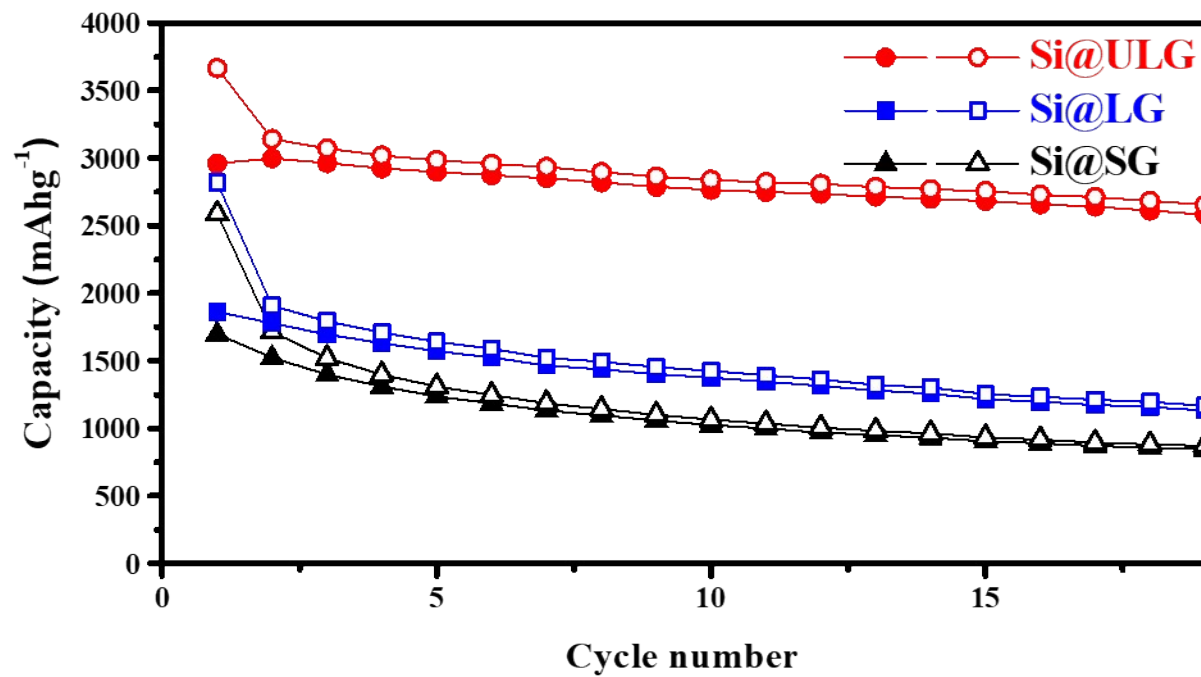

**Fig. S4.** The cyclic performance of the Si@ULG, SI@LG, and Si@SG nanocomposite electrodes using PVDF binders at C/20.

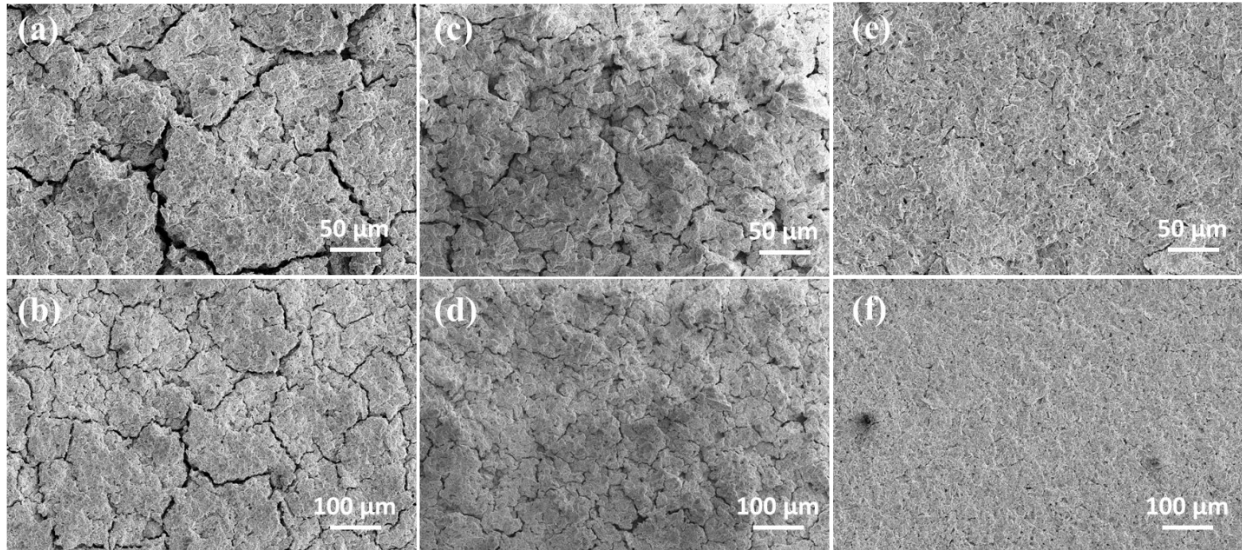

**Fig. S5** The SEM images of the Si-graphene composite electrodes after 50 cycles at 0.2 C. **(a, b)**, Si@SG; **(c, d)**, Si@LG; and **(e, f)**, Si@ULG.

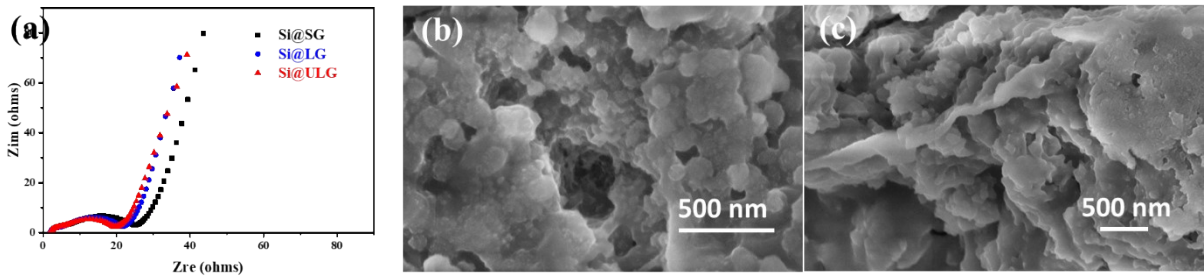

**Fig. S6.** (a) The EIS of the Si-graphene electrodes after 50 cycles at 0.2C; (b, c) the higher magnification images of the cycled Si@ULG electrode.

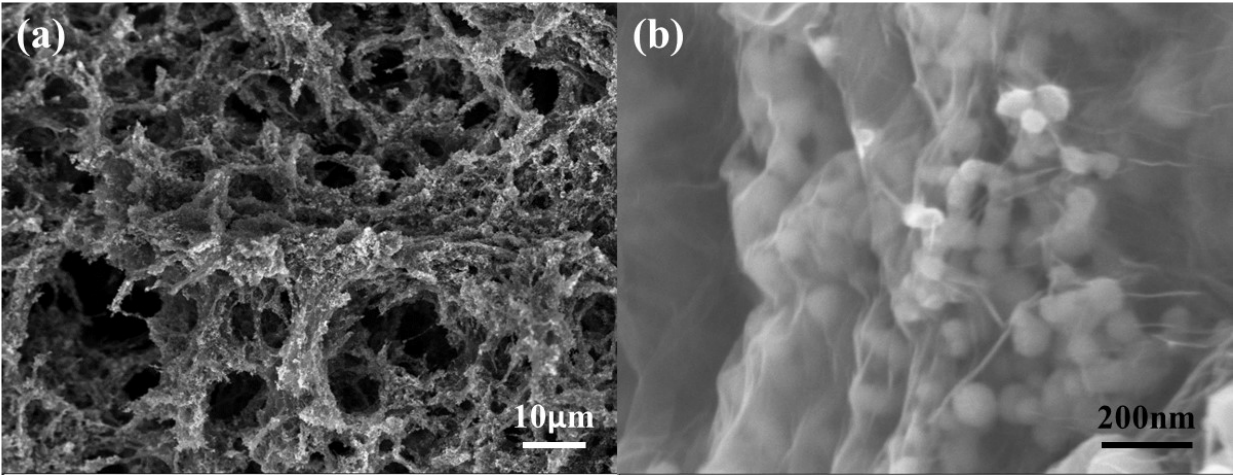

**Fig. S7.** Morphology characterization via SEM of freestanding 3D Si@ULG-ULG nanocomposite electrode at low magnification **(a)**, and high magnification **(b)**.



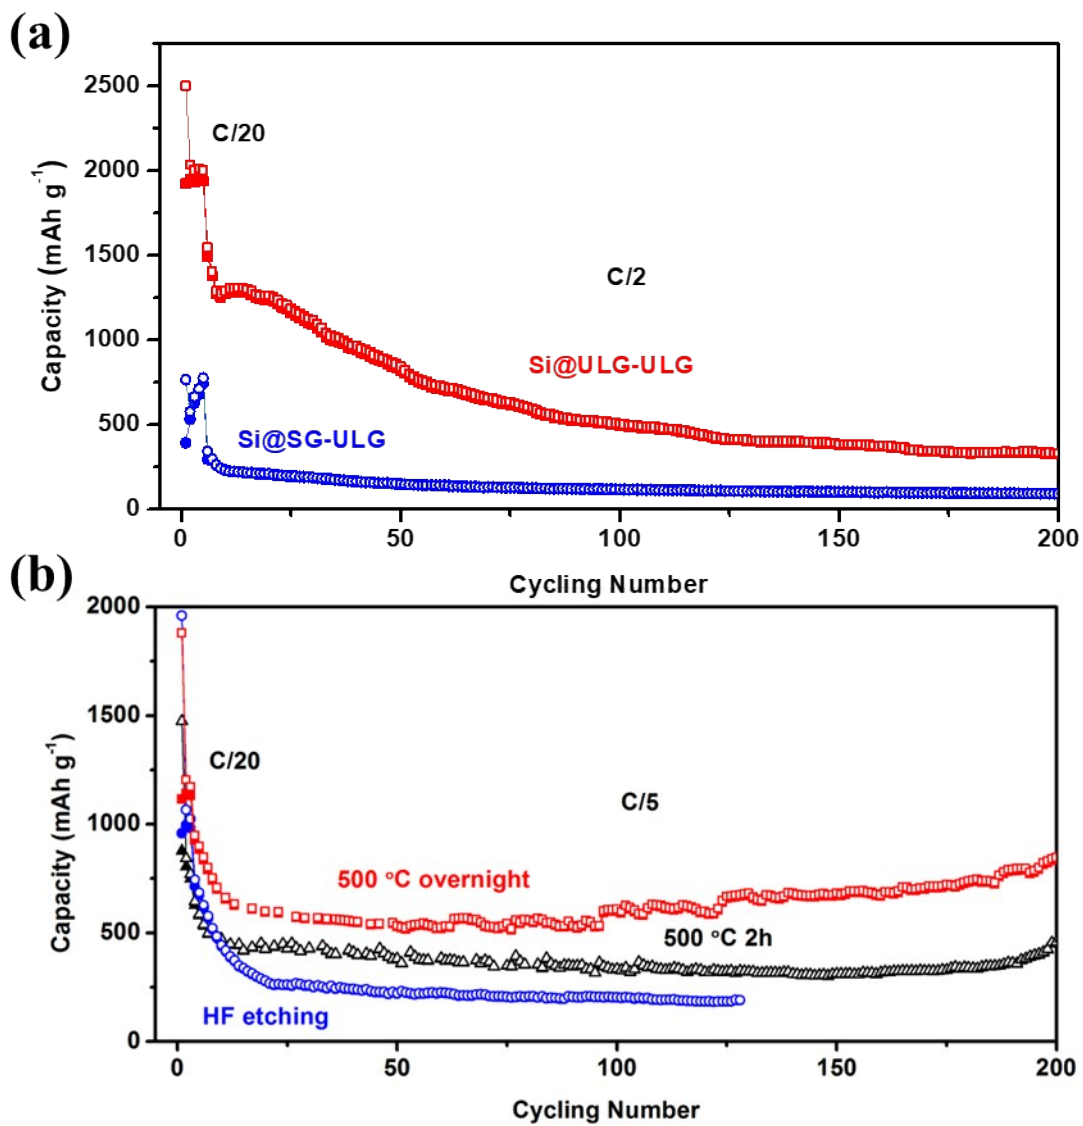

**Fig. S8.** (a) The cyclic performance of various 3D freestanding nanocomposite anodes with different sizes of graphene sheets at C/2. (b) The influence of affinity on the electrochemical performance by tuning the oxidation layer on the surface of Si and remaining function groups in reduced GO sheets (Si@ULG-ULG).

**Table S1. The fitted results from the Nyquist plot of the Si@ULG composite half cells.**

| Sample | $R_0$ (ohm) | $R_{ct}$ (ohm) | W (ohm) |
|--------|-------------|----------------|---------|
| Si@ULG | 1.92        | 74.8           | 1.4     |
| Si@LG  | 1.47        | 137.5          | 122     |
| Si@SG  | 0.27        | 290.4          | 269.2   |

**Table S2. The capacity retention of the Si@ULG nanocomposite electrodes with different percentages of ULG.**

| Sample     | 1 <sup>st</sup> Charge Capacity (0.2 C) | 150 <sup>th</sup> Charge Capacity (0.2 C) | Retention |
|------------|-----------------------------------------|-------------------------------------------|-----------|
| Si@ULG 30% | 1603                                    | 1260                                      | 79%       |
| Si@ULG 25% | 2524                                    | 1540                                      | 60%       |

**Table S3. The comparison of Si@graphene composite with the reported Si composite electrodes.**

| Electrodes                 | Areal Mass Loading (mg cm <sup>-2</sup> ) | Gravimetric Capacity <sup>1</sup> (mAh g <sup>-1</sup> ) | Capacity loss per cycle (cycles) | Current Density (mA g <sup>-1</sup> ) | Reference        |
|----------------------------|-------------------------------------------|----------------------------------------------------------|----------------------------------|---------------------------------------|------------------|
| Si@ULG composite           | 0.26                                      | 2751                                                     | 0.23% (200)                      | 840                                   | <b>This work</b> |
| 3D Si@ULG-ULG              | 3                                         | 1800                                                     | 0.2% (250)                       | 840                                   |                  |
| Si/graphene composite      | NA                                        | 2158                                                     | 1.5%                             | 100                                   | [1]              |
| Si@graphene cage composite | NA                                        | ~2100                                                    | 0.28% (200)                      | 1000                                  | [2]              |
| rGO-porous Si composite    | 0.33                                      | ~1750                                                    | 0.26% (200)                      | 1000                                  | [3]              |
| SiNP@graphene cage/GNS     | NA                                        | 2449                                                     | 0.2% (200)                       | 1000                                  | [4]              |
| rGO/Si composites          | 1.35                                      | 2500                                                     | 0.25% (300)                      | 210                                   | [5]              |
| 3D Si@rGO composite        | 2.6                                       | 2963                                                     | 0.27% (200)                      | 500                                   | [6]              |
| Sputtered Si on CVD-rMGO   | 0.23                                      | ~1200                                                    | 0.33% (90)                       | 132                                   | [7]              |

## Reference:

- [1] Chou, S.L., Wang, J.Z., Choucair, M., Liu, H.K., Stride, J.A. and Dou, S.X., Enhanced reversible lithium storage in a nanosize silicon/graphene composite. *Electrochem. Commun.* 2010, 12(2), pp.303-306.
- [2] Nie, P., Le, Z. Y., Chen, G., Liu, D., Liu, X. Y., Wu, H. B., Xu, P. C., Li, X. R., Liu, F., Chang, L. M., Zhang, X. G., Lu, Y. F., Graphene Caging Silicon Particles for High-Performance Lithium-Ion Batteries, *Small* 2018, 14, 1800635.
- [3] Jiao, L.S., Liu, J.Y., Li, H.Y., Wu, T.S., Li, F., Wang, H.Y. and Niu, L., Facile synthesis of reduced graphene oxide-porous silicon composite as superior anode material for lithium-ion battery anodes. *J. Power Sources*, 2016, 315, pp.9-15.
- [4] Han, X.Y., Zhao, D.L., Meng, W.J., Yang, H.X., Zhao, M., Duan, Y.J. and Tian, X.M., Graphene caging silicon nanoparticles anchored on graphene sheets for high performance Li-ion batteries. *Applied Surface Science*, 2019, 484, pp.11-20.
- [5] Yue, H., Li, Q., Liu, D., Hou, X., Bai, S., Lin, S. and He, D., High-yield fabrication of graphene-wrapped silicon nanoparticles for self-support and binder-free anodes of lithium-ion batteries. *J. Alloys Compd.*, 2018, 744, pp.243-251.
- [6] Wasalathilake, K.C., Hapuarachchi, S.N., Zhao, Y., Fernando, J.F., Chen, H., Nerkar, J.Y., Golberg, D., Zhang, S. and Yan, C., Unveiling the working mechanism of graphene bubble film/silicon composite anodes in Li-ion batteries: from experiment to modeling. *ACS Appl. Energy Mater.*, 2019, 3(1), pp.521-531.
- [7] Lockett, M., Sarmiento, V., Gonzalez, M., Ahn, S., Wang, J., Liu, P. and Vazquez-Mena, O., Ultrathin 5  $\mu\text{m}$  Thick Silicon Nanowires Intercalated with Reduced Graphene Oxide Binderless Anode for Lithium-Ion Batteries. *ACS Appl. Energy Mater.*, 2021, 4(7), pp.6391-6398.
